# Supplementary material
Source: MDPI journal article supplement (https://www.mdpi.com/2073-4441/12/9/2449)
Supplement: s1 [file s1]

Table S1 Salinity of irrigation water in different years (gL<sup>-1</sup>)

| Treatment | K1   | K2   | K3   | K4   | K5    | K6   |
|-----------|------|------|------|------|-------|------|
| 2008      | 0.45 | 1.95 | 2.40 | 2.82 | 2.91  | 3.27 |
| 2009      | 0.46 | 2.24 | 3.81 | 6.58 | 10.05 |      |
| 2010      | 0.35 | 2.38 | 4.42 | 6.00 | 9.16  |      |

[illegible]

Table S3 Dates of cotton growth stages of Experiment One

| Year | Seedling stage | Bud stage | Flowering–boll | Boll-opening stage |
|------|----------------|-----------|----------------|--------------------|
|      |                |           | stage          |                    |
| 2008 | 5/2-6/13       | 6/14-7/8  | 7/9-9/1        | 9/2-10/31          |
| 2009 | 5/1-6/12       | 6/13-7/7  | 7/8-8/31       | 9/1-10/31          |
| 2010 | 5/10-6/20      | 6/21-7/7  | 7/8-8/26       | 8/27-10/31         |

Table S4 Dates of cotton growth stages of Experiment Two

| Year | Seedling stage | Bud stage | Flowering–boll<br>stage | Boll-opening stage |
|------|----------------|-----------|-------------------------|--------------------|
| 2008 | 4/15-6/13      | 6/10-7/8  | 7/8-9/2                 | 9/2-10/2           |

Table S5 Irrigation schedule of Experiment Two

| Experiments | Treatments and<br>Irrigation dates | Irrigation schedule |      |      |      |      |      |      |      |      |      |      |      |
|-------------|------------------------------------|---------------------|------|------|------|------|------|------|------|------|------|------|------|
|             | Irrigation dates                   | 6/15                | 6/23 | 7/1  | 7/7  | 7/13 | 7/19 | 7/25 | 7/31 | 8/6  | 8/12 | 8/18 | 8/24 |
|             | 0.6ET                              | 36                  | 27.7 | 31.6 | 18   | 15.6 | 15.6 | 21.7 | 16.8 | 19.2 | 28.2 | 17.6 | 22.7 |
|             | 0.8ET                              | 48                  | 36.9 | 42.1 | 24   | 20.8 | 20.8 | 28.9 | 22.4 | 25.6 | 37.6 | 23.5 | 30.2 |
|             | 1.0ET                              | 60                  | 46.1 | 52.6 | 30   | 26   | 26   | 36.1 | 28   | 32   | 47   | 29.4 | 37.8 |
|             | 1.2ET                              | 72                  | 55.3 | 63.1 | 36   | 31.2 | 31.2 | 43.3 | 33.6 | 38.4 | 56.4 | 35.3 | 45.4 |
| Experiments | Treatments and<br>Irrigation dates | 6/15                | 6/23 | 7/4  | 7/14 | 7/21 | 7/28 | 8/5  | 8/12 | 8/19 | 8/23 | 6/15 |      |
|             | Irrigation dates                   | 6/15                | 6/23 | 7/4  | 7/14 | 7/21 | 7/28 | 8/5  | 8/12 | 8/19 | 8/23 | 6/15 |      |
|             | A1B3                               | 45                  | 45   | 45   | 45   | 30   | 30   | 30   | 30   | 30   | 30   |      |      |
|             | A1B4                               | 45                  | 45   | 45   | 45   | 22.5 | 22.5 | 22.5 | 22.5 | 22.5 | 22.5 |      |      |
|             | A1B2                               | 45                  | 45   | 45   | 45   | 37.5 | 37.5 | 37.5 | 37.5 | 37.5 | 37.5 |      |      |
|             | A1B1                               | 45                  | 45   | 45   | 45   | 45   | 45   | 45   | 45   | 45   | 45   |      |      |
|             | A2B3                               | 37.5                | 37.5 | 37.5 | 37.5 | 30   | 30   | 30   | 30   | 30   | 30   |      |      |
|             | A2B4                               | 37.5                | 37.5 | 37.5 | 37.5 | 22.5 | 22.5 | 22.5 | 22.5 | 22.5 | 22.5 |      |      |
|             | A2B1                               | 37.5                | 37.5 | 37.5 | 37.5 | 45   | 45   | 45   | 45   | 45   | 45   |      |      |
|             | A3B2                               | 30                  | 30   | 30   | 30   | 37.5 | 37.5 | 37.5 | 37.5 | 37.5 | 37.5 |      |      |
|             | A3B4                               | 30                  | 30   | 30   | 30   | 22.5 | 22.5 | 22.5 | 22.5 | 22.5 | 22.5 |      |      |
|             | A3B1                               | 30                  | 30   | 30   | 30   | 45   | 45   | 45   | 45   | 45   | 45   |      |      |
|             | A4B2                               | 22.5                | 22.5 | 22.5 | 22.5 | 37.5 | 37.5 | 37.5 | 37.5 | 37.5 | 37.5 |      |      |
|             | A4B3                               | 22.5                | 22.5 | 22.5 | 22.5 | 30   | 30   | 30   | 30   | 30   | 30   |      |      |
|             | A4B1                               | 22.5                | 22.5 | 22.5 | 22.5 | 45   | 45   | 45   | 45   | 45   | 45   |      |      |

Table S6. Data recorded of the two experiment in 2008-2010 and 2018

| Years     | Data                                                                        |
|-----------|-----------------------------------------------------------------------------|
| 2008-2010 | Meteorological data                                                         |
|           | Soil physical and chemical properties                                       |
|           | Division of growth stages                                                   |
|           | Soil moisture content and soil salt content during the entire growth period |
|           | Cotton yield                                                                |
| 2018      | Treatments and setups of two experiments                                    |
|           | Meteorological data                                                         |
|           | Division of growth stages                                                   |
|           | Soil moisture content and soil salt content during the entire growth period |
|           | Cotton yield                                                                |

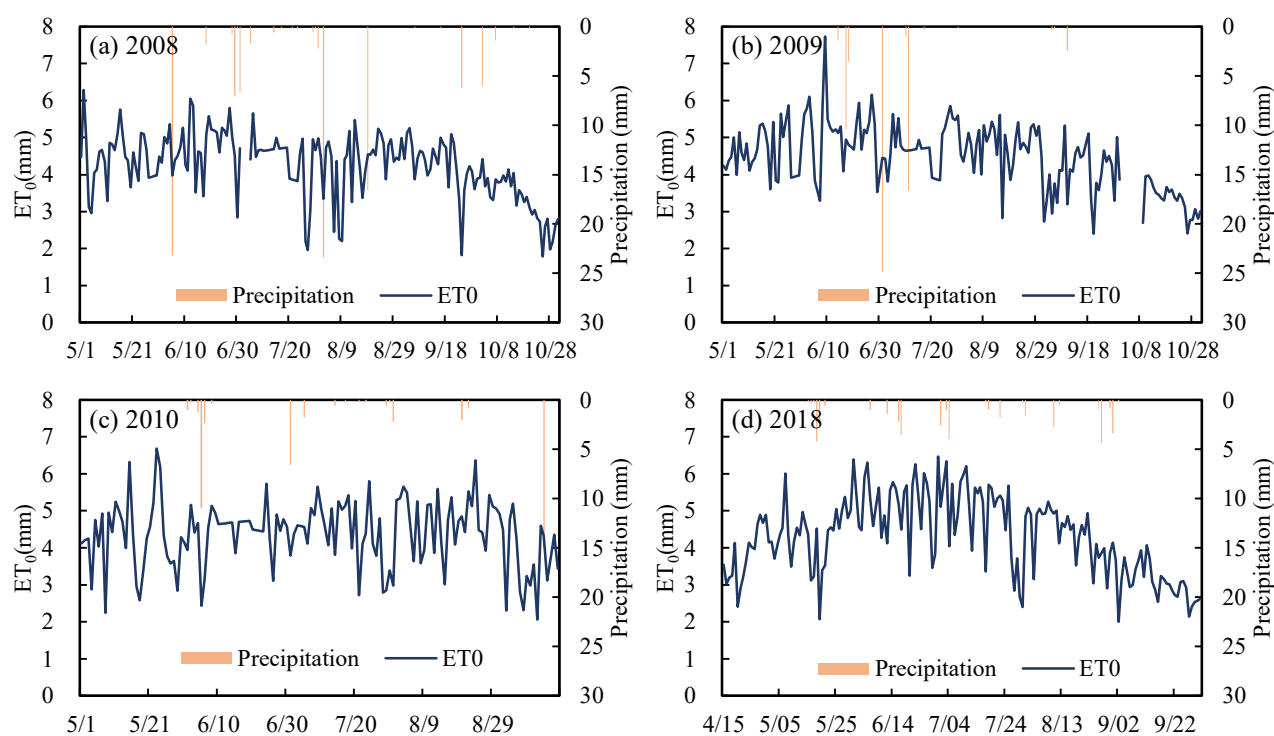

Figure S1 Daily reference evapotranspiration ( $ET_0$ ) and precipitation during the whole growth period of cotton in Experiment One (a-c) and Experiment Two (d). Note: Data discontinuity indicates that the data is missing.

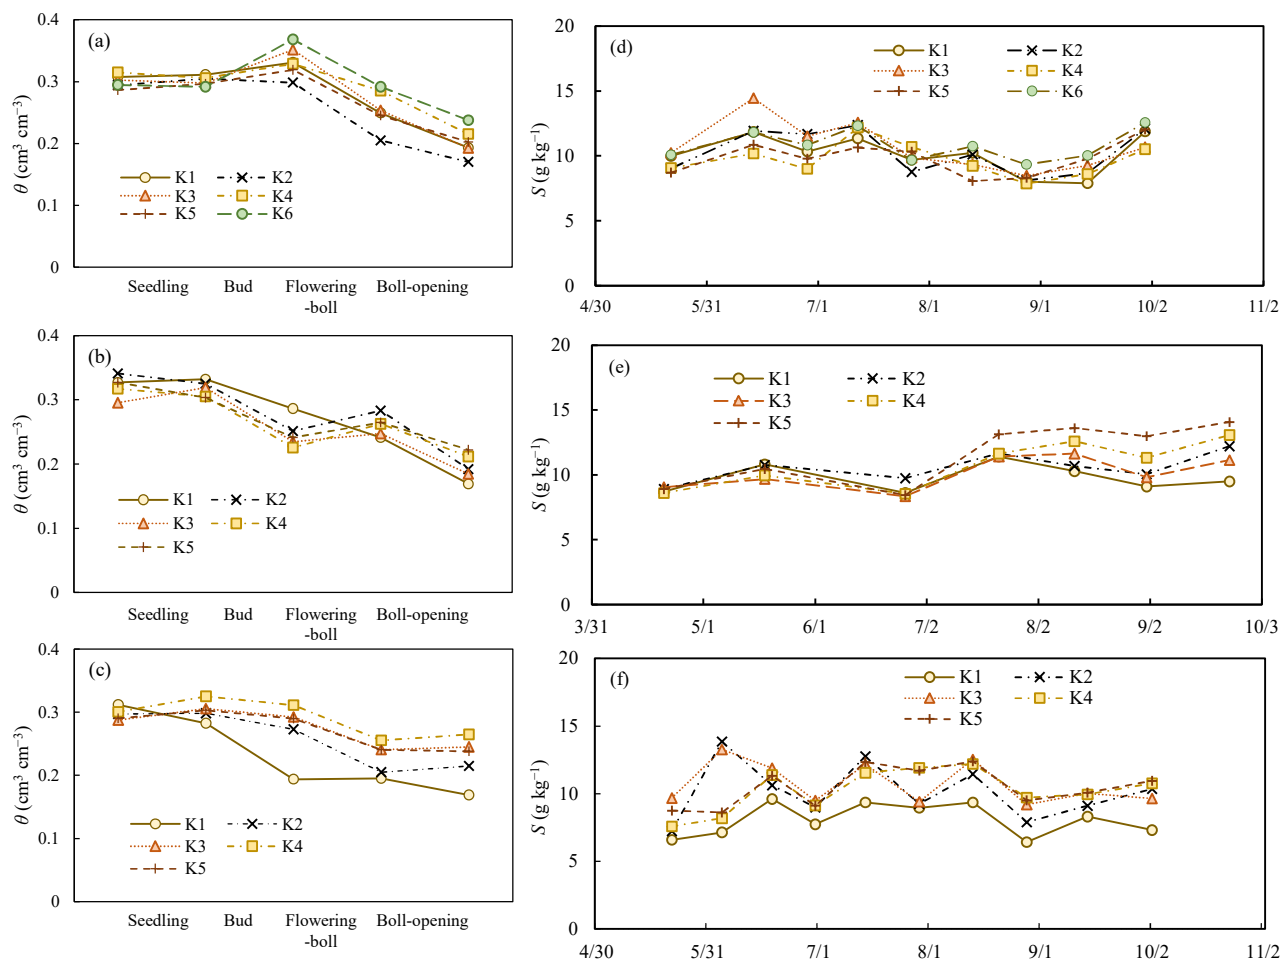

Figure S2. Soil moisture content of (a) 2008, (b) 2009, (c) 2010 and soil salt content of (d) 2008, (e) 2009 and (f) 2010.
